# Supplementary material for: Germanium Complexes with ONO Tridentate Ligands: O-H Bond Activation Control According to DFT Calculations
Source: MDPI journal article supplement (doi:10.3390/ijms241210218), 2023-06-16
Supplement: s1 [file s1]

## SUPPORTING INFORMATION

for

# Germanium Complexes with *ONO* Tridentate Ligands: O-H Bond Activation Control According to DFT Calculations

Kirill V. Zaitsev<sup>1</sup>, Andrey D. Trubachev<sup>1</sup> and Oleg Kh. Poleshchuk<sup>2,3,\*</sup>

<sup>1</sup> Chemistry Department, M.V. Lomonosov Moscow State University, Leninskiye Gory 1, 3, Moscow 119991, Russia

<sup>2</sup> National Research Tomsk State University, Lenin Av., 36, Tomsk 634050, Russia

<sup>3</sup> Tomsk State Pedagogical University, Kievskaya Str., 60, Tomsk 634061, Russia

\* Correspondence: poleshch@tspu.edu.ru

## Table of Content

### *Atom coordinates for model compounds*

|                   |     |
|-------------------|-----|
| <b>4-H</b> .....  | S3  |
| <b>4-Me</b> ..... | S6  |
| <b>6-H</b> .....  | S9  |
| <b>6-Me</b> ..... | S12 |
| <b>II</b> .....   | S16 |

*Molecular orbitals of the model compounds*

|                                                             |     |
|-------------------------------------------------------------|-----|
| <b>Figure S1.</b> HOMO orbital of compound <b>6-H</b> ..... | S19 |
| <b>Figure S2.</b> LUMO orbital of compound <b>6-H</b> ..... | S20 |
| <b>Figure S3.</b> HOMO orbital of compound <b>II</b> .....  | S21 |
| <b>Figure S4.</b> LUMO orbital of compound <b>II</b> .....  | S22 |

## Atom coordinates for model compounds

### 4-H

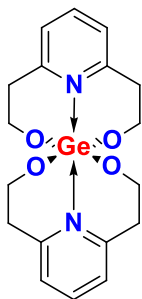

G= - 3184.330 a.e.

|    |             |             |             |
|----|-------------|-------------|-------------|
| Ge | 0.00000000  | 0.00001000  | -0.08125000 |
| O  | -0.34313500 | -1.26885000 | 1.25539900  |
| O  | -0.13654100 | 1.32036500  | -1.36714600 |
| O  | 0.34314000  | 1.26881800  | 1.25545300  |
| O  | 0.13652000  | -1.32026200 | -1.36723000 |
| C  | 0.71569900  | -1.57272500 | 2.11556000  |
| C  | 1.96626200  | -2.05867800 | 1.35659400  |
| C  | 0.87341600  | 2.28574700  | -1.43061200 |
| C  | 2.20803300  | 1.66921500  | -1.87035100 |
| N  | 2.16086200  | -0.09549500 | -0.12962300 |
| N  | -2.16086300 | 0.09548700  | -0.12964700 |
| C  | 2.88752400  | 0.79434200  | -0.84579100 |
| C  | 2.78068500  | -0.98307000 | 0.68497600  |
| C  | 4.27638100  | 0.85746000  | -0.70071000 |
| C  | 4.16604400  | -0.95058200 | 0.85424600  |
| C  | 4.92398400  | -0.00920100 | 0.16906500  |
| C  | -2.78068500 | 0.98308000  | 0.68493200  |

|   |             |             |             |
|---|-------------|-------------|-------------|
| C | -2.88752400 | -0.79438600 | -0.84577200 |
| C | -4.16604100 | 0.95058500  | 0.85422200  |
| C | -4.27637800 | -0.85751600 | -0.70066500 |
| C | -4.92397900 | 0.00916900  | 0.16908700  |
| H | 0.39217700  | -2.38436000 | 2.78473500  |
| H | 0.99289500  | -0.71025300 | 2.74231700  |
| H | 1.62287400  | -2.75370800 | 0.57983400  |
| H | 2.62550700  | -2.61201100 | 2.03547600  |
| H | 1.00802800  | 2.79635000  | -0.46652600 |
| H | 0.58390200  | 3.03774100  | -2.18014000 |
| H | 2.91187900  | 2.45411900  | -2.17298200 |
| H | 1.99992300  | 1.05222800  | -2.75541900 |
| H | 4.83418100  | 1.58623600  | -1.27921600 |
| H | 4.63463600  | -1.66817200 | 1.51937900  |
| H | 6.00226800  | 0.03483200  | 0.29659600  |
| H | -4.63463200 | 1.66819400  | 1.51933700  |
| H | -4.83417900 | -1.58632000 | -1.27913500 |
| H | -6.00226100 | -0.03487300 | 0.29663500  |
| C | -0.87337000 | -2.28571800 | -1.43065600 |
| C | -2.20804900 | -1.66928000 | -1.87032900 |
| C | -0.71573100 | 1.57274100  | 2.11555100  |
| C | -1.96625300 | 2.05870100  | 1.35651400  |
| H | -1.00790300 | -2.79633500 | -0.46656800 |
| H | -0.58383800 | -3.03768700 | -2.18020200 |
| H | -2.91187400 | -2.45423800 | -2.17287300 |
| H | -2.00004100 | -1.05232800 | -2.75544600 |

|   |             |            |            |
|---|-------------|------------|------------|
| H | -0.39222500 | 2.38438700 | 2.78472100 |
| H | -0.99297600 | 0.71029300 | 2.74232100 |
| H | -1.62281200 | 2.75367200 | 0.57972700 |
| H | -2.62550100 | 2.61209100 | 2.03534600 |

#### 4-Me

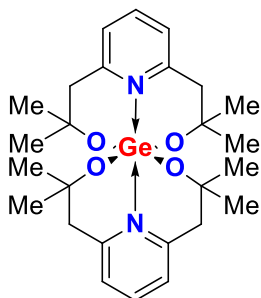

G= - 3498.638 a.e.

|    |             |             |             |
|----|-------------|-------------|-------------|
| Ge | -0.00001800 | -0.00002800 | -0.08948000 |
| O  | 0.32467300  | 1.27174700  | 1.26986200  |
| O  | 0.09729600  | -1.35183300 | -1.38115200 |
| O  | -0.32426500 | -1.27257700 | 1.26936100  |
| O  | -0.09769200 | 1.35230400  | -1.38060800 |
| C  | -0.69543700 | 1.93197000  | 2.00120500  |
| C  | -1.88281100 | 2.29783700  | 1.07591800  |
| C  | -0.96068800 | -2.13743400 | -1.88091500 |
| C  | -2.19529700 | -1.25507800 | -2.16545200 |
| N  | -2.11681700 | 0.23484300  | -0.21715900 |
| N  | 2.11680200  | -0.23471100 | -0.21787200 |
| C  | -2.85999600 | -0.59103400 | -0.98924700 |
| C  | -2.71849300 | 1.15469400  | 0.57137500  |
| C  | -4.24315000 | -0.66410800 | -0.81459700 |
| C  | -4.10046200 | 1.12009200  | 0.77084200  |
| C  | -4.86661000 | 0.16712800  | 0.10989600  |
| C  | 2.71872600  | -1.15484200 | 0.57014400  |
| C  | 2.85974300  | 0.59178900  | -0.98952300 |
| C  | 4.10069000  | -1.12001200 | 0.76960100  |

|   |             |             |             |
|---|-------------|-------------|-------------|
| C | 4.24288600  | 0.66507100  | -0.81490500 |
| C | 4.86657700  | -0.16651500 | 0.10912800  |
| H | -1.46738800 | 2.78570300  | 0.18745200  |
| H | -2.54259800 | 3.00522400  | 1.58956500  |
| H | -2.95190000 | -1.83214200 | -2.70861800 |
| H | -1.85408300 | -0.43992100 | -2.81670500 |
| H | -4.81803200 | -1.35048300 | -1.42714300 |
| H | -4.55904700 | 1.85421900  | 1.42464700  |
| H | -5.94055000 | 0.11348600  | 0.26676900  |
| H | 4.55945300  | -1.85437800 | 1.42301400  |
| H | 4.81760600  | 1.35188800  | -1.42710700 |
| H | 5.94050900  | -0.11268200 | 0.26598700  |
| C | 0.96008900  | 2.13838900  | -1.88009200 |
| C | 2.19479000  | 1.25637600  | -2.16528900 |
| C | 0.69607400  | -1.93330700 | 1.99989200  |
| C | 1.88325000  | -2.29840300 | 1.07407700  |
| H | 2.95125100  | 1.83382600  | -2.70824800 |
| H | 1.85360700  | 0.44153400  | -2.81695200 |
| H | 1.46766000  | -2.78567000 | 0.18535700  |
| H | 2.54320700  | -3.00610900 | 1.58707400  |
| C | 1.34043000  | 3.28471200  | -0.92464400 |
| H | 2.14883400  | 3.89764700  | -1.34451100 |
| H | 0.47316200  | 3.93549200  | -0.76669000 |
| H | 1.64722700  | 2.89317700  | 0.04690000  |
| C | 0.46355500  | 2.72110900  | -3.21455100 |
| H | 1.20694800  | 3.38417800  | -3.67400000 |

|   |             |             |             |
|---|-------------|-------------|-------------|
| H | 0.22646500  | 1.91565900  | -3.91820700 |
| H | -0.45178500 | 3.29634800  | -3.03939600 |
| C | -0.08126500 | 3.23246100  | 2.54706700  |
| H | 0.19779600  | 3.91037100  | 1.73473900  |
| H | -0.77660700 | 3.75491700  | 3.21575200  |
| H | 0.82442200  | 2.99107300  | 3.11351800  |
| C | -1.23331300 | 1.09328200  | 3.17764300  |
| H | -0.46543600 | 0.97943900  | 3.94695900  |
| H | -2.09819800 | 1.58721900  | 3.64049100  |
| H | -1.52363900 | 0.09903300  | 2.83189200  |
| C | -0.46450400 | -2.71957600 | -3.21576500 |
| H | -1.20804400 | -3.38241600 | -3.67530900 |
| H | -0.22757400 | -1.91382300 | -3.91912500 |
| H | 0.45085100  | -3.29494000 | -3.04110400 |
| C | -1.34106800 | -3.28416800 | -0.92596800 |
| H | -0.47380500 | -3.93502700 | -0.76828700 |
| H | -1.64783400 | -2.89300400 | 0.04573500  |
| H | -2.14948400 | -3.89690200 | -1.34609500 |
| C | 0.08213500  | -3.23422600 | 2.54498600  |
| H | -0.19711900 | -3.91159700 | 1.73227300  |
| H | 0.77769300  | -3.75711300 | 3.21311200  |
| H | -0.82340400 | -2.99329200 | 3.11186700  |
| C | 1.23418100  | -1.09543200 | 3.17683800  |
| H | 0.46656600  | -0.98222000 | 3.94650600  |
| H | 2.09928400  | -1.58960800 | 3.63904800  |
| H | 1.52439200  | -0.10091500 | 2.83174400  |



## 6-H

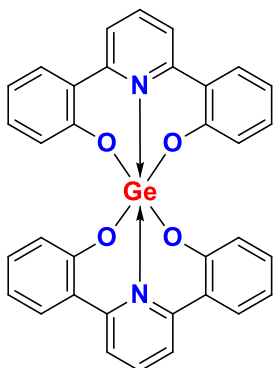

G= - 3794.023 a.e.

|    |             |             |             |
|----|-------------|-------------|-------------|
| Ge | 0.11106700  | 0.02636600  | -0.06377700 |
| O  | -1.90758400 | -2.93475700 | 0.88408700  |
| O  | -0.04139500 | 1.83636400  | 0.28648800  |
| O  | 0.25629400  | -0.23625000 | 1.83538900  |
| O  | 0.06903500  | 0.44513400  | -1.90450400 |
| N  | -2.11408800 | 0.01203600  | 0.02869000  |
| N  | 2.16232900  | 0.18262900  | -0.14054100 |
| C  | -2.79596400 | -0.87338800 | -0.73863800 |
| C  | -2.78299600 | 1.01336500  | 0.66013700  |
| C  | -4.16394000 | -0.73980500 | -0.96986000 |
| C  | -4.16437800 | 1.18078700  | 0.45165400  |
| C  | -4.85480000 | 0.31426600  | -0.37818000 |
| C  | 2.87537800  | -0.66314300 | 0.65832200  |
| C  | 2.77749400  | 1.05165500  | -0.99192800 |
| C  | 4.27310100  | -0.60256100 | 0.66181300  |
| C  | 4.18194800  | 1.08503400  | -1.03823300 |
| C  | 4.92544100  | 0.27282900  | -0.19780800 |
| C  | -0.72998300 | 2.31276500  | 1.32620400  |

|   |             |             |             |
|---|-------------|-------------|-------------|
| C | -2.06968000 | 1.92861400  | 1.56959900  |
| C | -2.74103500 | 2.49278900  | 2.67083200  |
| C | -2.12837000 | 3.42456000  | 3.49900900  |
| C | -0.81437900 | 3.82352900  | 3.22572000  |
| C | -0.12396000 | 3.27043300  | 2.15581300  |
| C | -1.67067900 | -3.09454300 | -0.45357100 |
| C | -1.03838500 | -4.22419900 | -0.97576000 |
| C | -2.09472100 | -2.06079400 | -1.30836300 |
| C | -0.82447600 | -4.32903200 | -2.35075200 |
| C | -1.88125900 | -2.18885400 | -2.68233600 |
| C | -1.24805600 | -3.31528700 | -3.20960700 |
| C | 0.69641600  | 1.52779800  | -2.35553300 |
| C | 0.07104700  | 2.29910800  | -3.35392700 |
| C | 0.66905400  | 3.44314000  | -3.85911800 |
| C | 1.91584800  | 3.85860100  | -3.37300400 |
| C | 2.55828800  | 3.09018300  | -2.41329200 |
| C | 1.98936000  | 1.90759600  | -1.89720600 |
| C | 0.93437300  | -1.32720100 | 2.15036500  |
| C | 0.39841600  | -2.22892100 | 3.09612500  |
| C | 2.17726500  | -1.63718700 | 1.52934300  |
| C | 1.06071600  | -3.40623200 | 3.42101700  |
| C | 2.81559200  | -2.84573700 | 1.87158900  |
| C | 2.27075000  | -3.73134500 | 2.79217200  |
| H | -4.66712800 | -1.47104500 | -1.59238300 |
| H | -4.67040400 | 2.01427300  | 0.92282700  |
| H | -5.91838600 | 0.44936000  | -0.55494700 |

|   |             |             |             |
|---|-------------|-------------|-------------|
| H | 4.83384700  | -1.22923700 | 1.34343900  |
| H | 4.67693900  | 1.72970300  | -1.75234800 |
| H | 6.01115100  | 0.31297000  | -0.21781600 |
| H | -3.75377300 | 2.17063500  | 2.89661400  |
| H | -2.66487800 | 3.83336400  | 4.35012300  |
| H | -0.32381400 | 4.55646900  | 3.86153000  |
| H | 0.89955800  | 3.55332800  | 1.93122300  |
| H | -0.71536000 | -5.01464000 | -0.30235200 |
| H | -0.32655800 | -5.20973800 | -2.74761400 |
| H | -2.18472800 | -1.37686300 | -3.33627300 |
| H | -1.07612800 | -3.39207400 | -4.27890300 |
| H | -0.90604200 | 1.97122500  | -3.69529800 |
| H | 0.15717400  | 4.02848400  | -4.61917000 |
| H | 2.37611500  | 4.77197200  | -3.73777900 |
| H | 3.51389000  | 3.43200400  | -2.02703500 |
| H | -0.54368800 | -1.95460000 | 3.56150000  |
| H | 0.63079400  | -4.08104900 | 4.15779800  |
| H | 3.74503800  | -3.11142300 | 1.37573700  |
| H | 2.78114100  | -4.66180200 | 3.02204700  |
| H | -1.21585100 | -3.38333600 | 1.39955700  |
| H | 0.17679600  | -1.48279500 | -0.35384600 |

## 6-Me

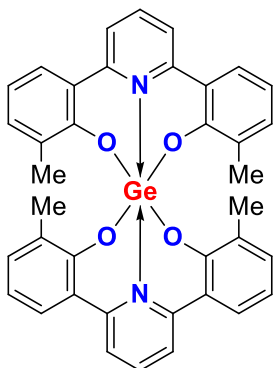

G= - 3951.193 a.e.

|    |             |             |             |
|----|-------------|-------------|-------------|
| Ge | -0.04244300 | 0.00247000  | 0.12649500  |
| O  | -1.66150400 | 0.37136300  | -0.70930200 |
| O  | 1.55602700  | -0.33073200 | 1.01248000  |
| O  | -0.81640200 | -1.45411400 | 0.98413800  |
| O  | 0.75210600  | 1.42016800  | -0.77509700 |
| N  | -0.58774900 | 1.25507600  | 1.66500700  |
| N  | 0.49777500  | -1.24283100 | -1.42794300 |
| C  | -1.36168600 | 2.35406100  | 1.39993400  |
| C  | -0.16402400 | 0.98131500  | 2.93878800  |
| C  | -1.75515400 | 3.19325900  | 2.45240300  |
| C  | -0.49787200 | 1.85651700  | 3.98250100  |
| C  | -1.30834000 | 2.95361200  | 3.74131300  |
| C  | -0.30983300 | -2.29914700 | -1.75819200 |
| C  | 1.65220400  | -0.99292700 | -2.12240800 |
| C  | 0.06826300  | -3.15941300 | -2.79992800 |
| C  | 1.99736000  | -1.80931300 | -3.20895700 |
| C  | 1.21283800  | -2.90316900 | -3.53659300 |
| C  | 1.53577000  | -0.76283300 | 2.27590500  |

|   |             |             |             |
|---|-------------|-------------|-------------|
| C | 0.66709400  | -0.19996200 | 3.23885100  |
| C | 0.68020800  | -0.73832800 | 4.54264700  |
| C | 1.54328700  | -1.76520600 | 4.88952100  |
| C | 2.42987700  | -2.27463800 | 3.93231400  |
| C | 2.43742600  | -1.79316000 | 2.62798100  |
| C | -2.01933600 | 1.63680400  | -0.92906300 |
| C | -2.63609000 | 1.95526800  | -2.15159200 |
| C | -1.82577000 | 2.65465000  | 0.03326200  |
| C | -3.00841300 | 3.25637400  | -2.44422500 |
| C | -2.19202700 | 3.97330900  | -0.31273900 |
| C | -2.76955500 | 4.30200500  | -1.53356200 |
| C | 2.01862200  | 1.31870100  | -1.17907700 |
| C | 2.86217800  | 2.43355900  | -1.03195500 |
| C | 4.19153200  | 2.37629200  | -1.41529100 |
| C | 4.74315200  | 1.19789400  | -1.95099300 |
| C | 3.89408300  | 0.11105000  | -2.12582000 |
| C | 2.52736600  | 0.14137600  | -1.77401800 |
| C | -1.71013400 | -2.20624600 | 0.34186300  |
| C | -2.83367900 | -2.66256300 | 1.05319200  |
| C | -1.55135900 | -2.57883300 | -1.01327100 |
| C | -3.80710500 | -3.42756000 | 0.43351100  |
| C | -2.57941700 | -3.33454100 | -1.61765600 |
| C | -3.71023500 | -3.75944500 | -0.93040400 |
| H | -2.42293600 | 4.01952400  | 2.25052700  |
| H | -0.10438900 | 1.67411900  | 4.97321200  |
| H | -1.59044300 | 3.61814300  | 4.55339500  |

|   |             |             |             |
|---|-------------|-------------|-------------|
| H | -0.53359200 | -4.03260600 | -3.01118300 |
| H | 2.87219700  | -1.56778600 | -3.79723400 |
| H | 1.49271500  | -3.55316400 | -4.36111000 |
| H | -0.02393900 | -0.37100500 | 5.28245400  |
| H | 1.52624800  | -2.17584900 | 5.89477600  |
| H | 3.11114200  | -3.07916600 | 4.20134300  |
| H | -2.79156500 | 1.14679600  | -2.85904500 |
| H | -3.47078300 | 3.47655700  | -3.40459400 |
| H | -1.98508800 | 4.77847000  | 0.38649900  |
| H | 2.43551000  | 3.33002200  | -0.59313700 |
| H | 4.82535700  | 3.25020300  | -1.27716100 |
| H | 4.31628200  | -0.80880800 | -2.52071000 |
| H | -2.91287900 | -2.37896300 | 2.09795400  |
| H | -4.67290100 | -3.75613200 | 1.00532000  |
| H | -2.50883300 | -3.56899500 | -2.67596300 |
| C | 3.33948400  | -2.35620100 | 1.56100500  |
| H | 2.74898300  | -2.73687500 | 0.71955900  |
| H | 4.00223800  | -1.58642300 | 1.14840500  |
| H | 3.95467400  | -3.17144700 | 1.95473200  |
| C | -4.80457600 | -4.54267100 | -1.61785300 |
| H | -4.99426600 | -5.49904600 | -1.11399200 |
| H | -5.75376500 | -3.99117700 | -1.62457900 |
| H | -4.54495100 | -4.76270400 | -2.65865200 |
| C | -3.12488600 | 5.72934900  | -1.88017200 |
| H | -2.56586000 | 6.08444900  | -2.75558100 |
| H | -4.19129200 | 5.83397300  | -2.11795500 |

|   |             |            |             |
|---|-------------|------------|-------------|
| H | -2.90298100 | 6.40876400 | -1.05057300 |
| C | 6.20797700  | 1.12217400 | -2.31464100 |
| H | 6.48369800  | 1.89481200 | -3.04375700 |
| H | 6.85078800  | 1.26733600 | -1.43674700 |
| H | 6.46142900  | 0.15026000 | -2.75073900 |

## II

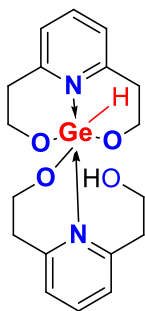

G= - 3184.206 a.e.

|    |             |             |             |
|----|-------------|-------------|-------------|
| Ge | -0.09933100 | -0.05675800 | -0.10827800 |
| O  | -0.48712800 | -1.55297100 | 0.91638500  |
| O  | 0.91653000  | 3.70899000  | -1.11975700 |
| O  | 0.23577600  | 0.92471500  | 1.48108400  |
| O  | 0.00205100  | -1.07482900 | -1.66628300 |
| C  | 0.52326600  | -2.03805900 | 1.75652400  |
| C  | 1.75701600  | -2.50237100 | 0.96384000  |
| C  | 1.91320300  | 2.93963900  | -0.45943700 |
| C  | 2.43653900  | 1.79638800  | -1.37163400 |
| N  | 2.16653300  | -0.30681100 | -0.09784300 |
| N  | -2.28774000 | 0.12091300  | -0.14929400 |
| C  | 3.00699700  | 0.62307700  | -0.61870700 |
| C  | 2.68219600  | -1.40234600 | 0.50749500  |
| C  | 4.39248600  | 0.50134600  | -0.48309000 |
| C  | 4.06190000  | -1.55618900 | 0.67491800  |
| C  | 4.93065400  | -0.58985000 | 0.18618600  |
| C  | -2.89483900 | 0.84329300  | 0.82475500  |
| C  | -3.02628000 | -0.60046300 | -1.02674100 |
| C  | -4.28283200 | 0.81449000  | 0.97441500  |



|   |             |             |             |
|---|-------------|-------------|-------------|
| C | -4.41780500 | -0.65719900 | -0.90331600 |
| C | -5.05396400 | 0.04368900  | 0.11278100  |
| H | 0.12025400  | -2.90230800 | 2.30437600  |
| H | 0.83294000  | -1.28056700 | 2.49181100  |
| H | 1.39105300  | -3.03508300 | 0.07657300  |
| H | 2.34116300  | -3.21402700 | 1.55892600  |
| H | 1.53228300  | 2.52323000  | 0.47988200  |
| H | 2.72783200  | 3.63219400  | -0.22243500 |
| H | 3.20298000  | 2.19001400  | -2.04816100 |
| H | 1.61383000  | 1.44381900  | -1.99653200 |
| H | 5.03082900  | 1.26581000  | -0.91401500 |
| H | 4.43688800  | -2.44000100 | 1.18039000  |
| H | 6.00541700  | -0.69419600 | 0.30803100  |
| H | -4.74313900 | 1.39795300  | 1.76479900  |
| H | -4.98739800 | -1.24941100 | -1.61183900 |
| H | -6.13442100 | 0.00366900  | 0.22155500  |
| C | -1.02545700 | -1.99075100 | -1.91113800 |
| C | -2.36076200 | -1.28444300 | -2.19897300 |
| C | -0.83210000 | 1.05521300  | 2.37029600  |
| C | -2.06129100 | 1.72811000  | 1.71928300  |
| H | -1.15837900 | -2.68826000 | -1.07269300 |
| H | -0.76313200 | -2.57729700 | -2.80485100 |
| H | -3.07792900 | -1.99393300 | -2.62959500 |
| H | -2.16113800 | -0.52308700 | -2.96683900 |
| H | -0.50920600 | 1.69324600  | 3.20669100  |
| H | -1.14169400 | 0.08473000  | 2.78983000  |

|   |             |            |             |
|---|-------------|------------|-------------|
| H | -1.68289800 | 2.57350000 | 1.12826600  |
| H | -2.71769900 | 2.14088500 | 2.49394800  |
| H | 0.15194100  | 3.11000900 | -1.19478700 |
| H | -0.11471800 | 1.26796000 | -0.94466100 |

*Molecular orbitals of the model compounds*

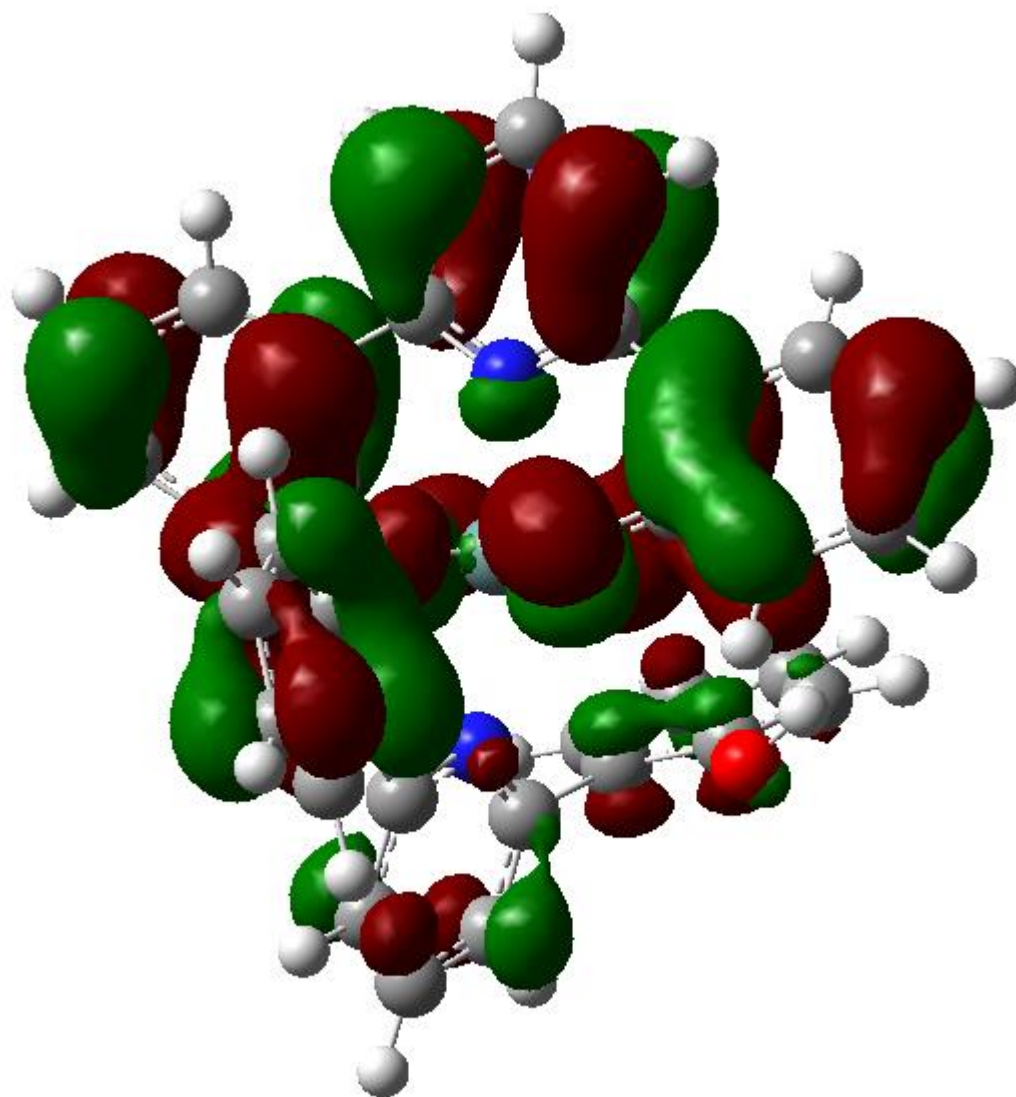

**Figure S1.** HOMO orbital of compound **6-H**.

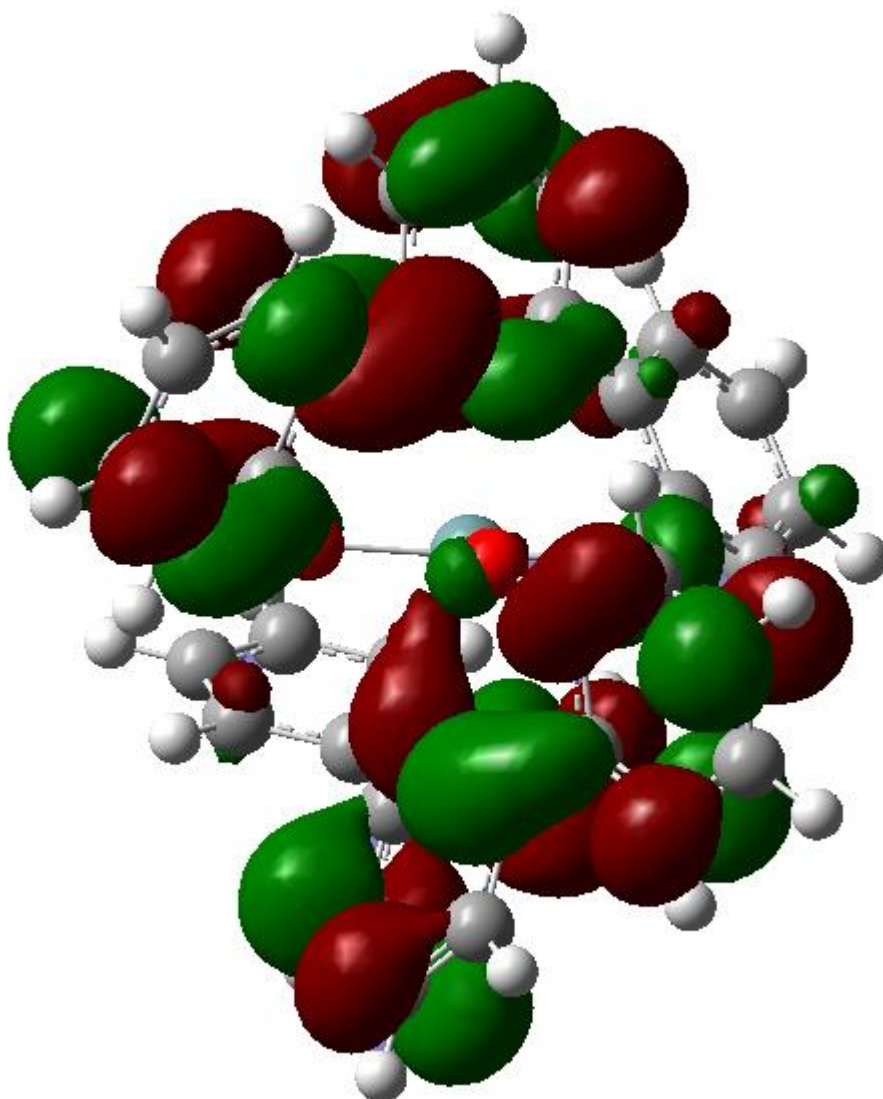

**Figure S2.** LUMO orbital of compound **6-H**.

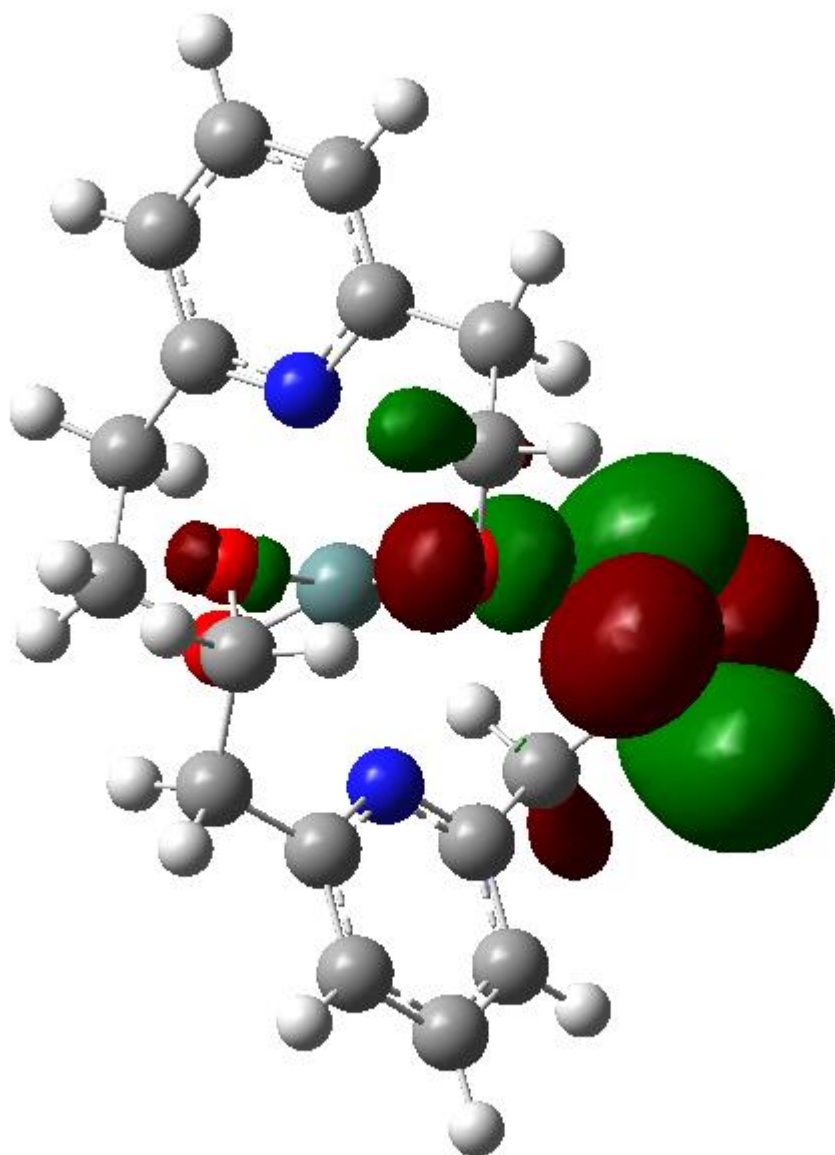

**Figure S3.** HOMO orbital of compound **II**.

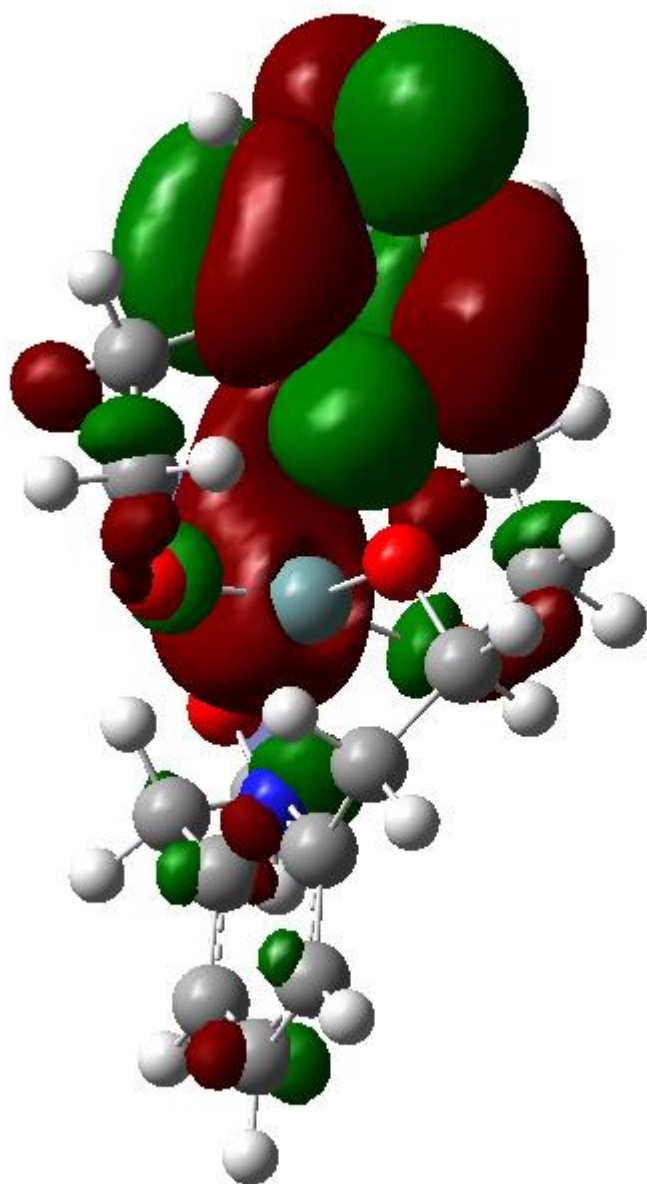

**Figure S4.** LUMO orbital of compound **II**.
